# Supplementary material
Source: Springer Nature journal article supplement (https://www.springermedizin.de/resource/supplementary/12986_2010_277_MOESM2_ESM.pdf/25655740)

**2a**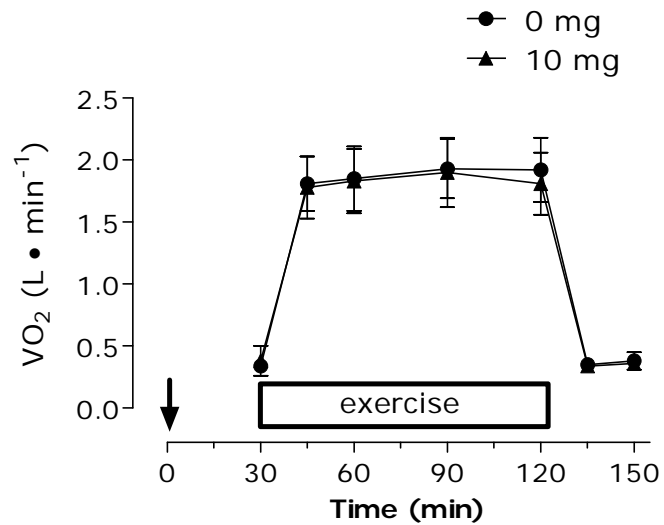**2b**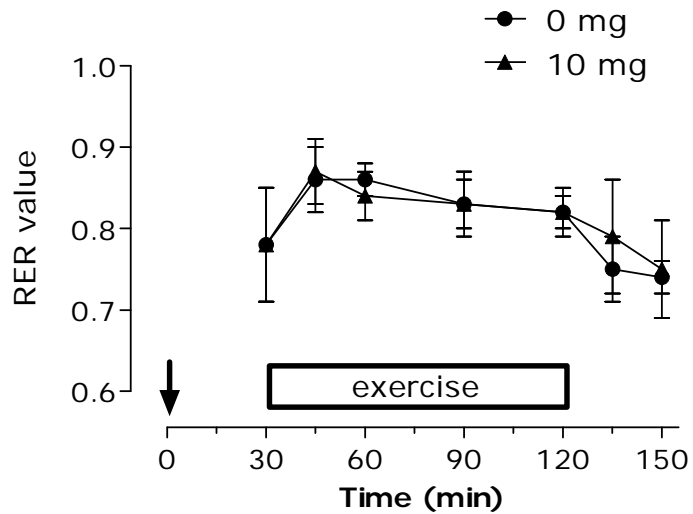**2c**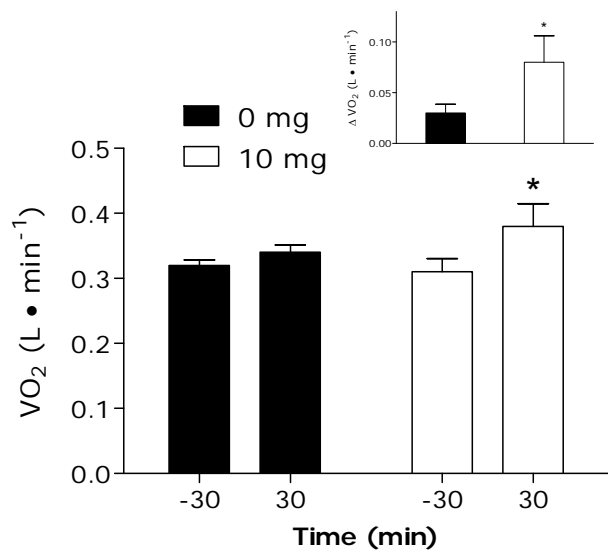**2d**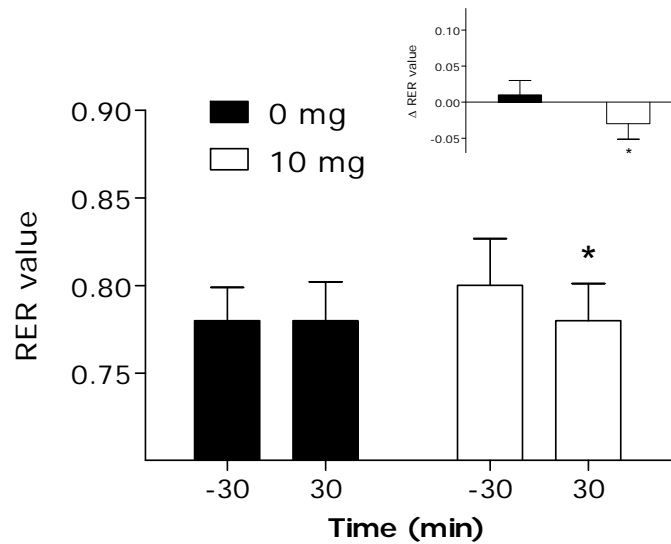

Supplement: MOESM2 [file 25655740]
